# Supplementary material for: Hierarchical structure LiFePO4@C synthesized by oleylamine-mediated method for low temperature applications
Source: Royal Society of Chemistry journal article supplement (doi:10.1039/c3ta15210c), 2014-01-01
Supplement: c3ta15210c.pdf [file c3ta15210c.pdf]

# Supporting information

## Hierarchical structure $\text{LiFePO}_4@\text{C}$ synthesized by oleylamine-mediated method for low temperature applications

Jingmin Fan, Jiajia Chen, Yongxiang Chen, Haihong Huang, Zhikai Wei, Ming-sen Zheng\*, Quanfeng Dong\*

Department of Chemistry, College of Chemistry and Chemical Engineering, Xiamen University, State Key Laboratory of Physical Chemistry of Solid Surfaces, Xiamen, Fujian, 361005, P. R. China

### Synthesis of nano- $\text{LiFePO}_4@\text{C}$ .

The nano- $\text{LiFePO}_4@\text{C}$  was prepared by using the modified pure oleylamine route<sup>1</sup> followed by a carbonization procedure. In a typical synthesis of  $\text{LiFePO}_4@\text{C}$ ,  $\text{FeCl}_2$  (8 mmol) and  $\text{CH}_3\text{COOLi} \cdot 2\text{H}_2\text{O}$  (8 mmol) were separately dissolved in 20 mL anhydrous ethanol. The two ethanol solutions and 1 mL aniline were added quickly into a continuously stirring 250 mL three-neck flask which was filled with 50 mL oleylamine at 100°C under nitrogen atmosphere, kept stirring at 100°C for 30 min. The solution color changed to brown. Then an  $\text{H}_3\text{PO}_4$  (0.55 mL,  $\geq 85\%$ ) anhydrous ethanol (5 mL) solution was also added dropwise into the reactor, the solution was then kept heating at 100°C for 1 h. Subsequently, the solution was heated from 100°C to 200°C within 40 min, and maintained 4 hours at 200°C, then cooled down to room temperature. The solution color changed to dark black. The resulted  $\text{LiFePO}_4$  nanocrystals were precipitated by adding 30 mL of ethanol and collected by centrifugation at 6000 rpm, then they were washed by cyclohexane and ethanol for 2 times. Finally, the product dried at 65°C in a vacuum oven overnight. The resulting material was carbonized for 4 hours at 600°C at the rate of 5°C min<sup>-1</sup> under argon containing 5%  $\text{H}_2$ .

### Characterizations

The synthesis products were characterized by powder X-ray diffraction (XRD), scanning electron microscopy (SEM), transmission electron microscopy (TEM), Raman spectroscopy and elemental analysis. The powder X-ray diffraction (XRD) measurements were performed with an X'pert PRO instrument (PANalytical) using Cu K $\alpha$  radiation ( $\lambda = 0.15418$  nm). TEM (including high-resolution transmission electron microscope, HRTEM) studies were performed on a TECNAI F-30 high-resolution transmission electron microscope operating at 300 kV. The samples were prepared by dropping ethanol dispersion of samples onto 300-mesh carbon-coated

copper grids and immediately evaporating the solvent. Scanning electron microscopy (SEM) was performed on scanning electron microscopes (Hitachi S-4800). Raman spectra were collected by a Ramshaw Raman microscope with an Ar laser 514 nm. Elemental analysis was performed on Vario EL III.

## Electrochemical Measurements<sup>2</sup>

The electrochemical properties of the  $\text{LiFePO}_4@\text{C}$  were measured in CR2016 coin-type cells. The cells were formed using a Li metal negative electrode, a Celgrade polypropylene separator, an electrolyte of 1 M  $\text{LiPF}_6$  in a 1:1:1 (volume) ethylene carbonate (EC), dimethyl carbonate (DMC), ethyl methyl carbonate (EMC) mixture. The cells were assembled in an argon-atmosphere-filled glove box, and then the cell was prepared by casting. To fabricate the positive electrode, a slurry of  $\text{LiMPO}_4$  powders (80 wt%), carbon black (Super P, 10 wt%), 10 wt% water soluble polymer n-lauryl acrylate (LA, Chengdu, China) with a little water-ethanol dispersant were ball milling for 6 h, and painted on an aluminum substrate, then dried in vacuum at 65°C overnight. The cells were galvanostatically charged and discharged with a Neware BT5-5V5mA Tester (Neware Co., Ltd, Shenzhen, China) at a voltage range of 2.4–4.2 V at room temperature. For  $\text{LiFePO}_4@\text{C}$  low temperature test, we run 0.1 C ( $17 \text{ mA g}^{-1}$ ) for two cycles at room temperature. Then the cells was put into a cryogenic insulation refrigeration box, the cells were charged and discharged at 2.4–4.2 V for 0°C and 2.2–4.2 V for below 0°C under certain rate of current. And all the charge and discharge capacities are based on the weight of  $\text{LiFePO}_4$ . At room temperature, 1 C =  $170 \text{ mA g}^{-1}$ , 1 C =  $140 \text{ mA g}^{-1}$  for low temperature test. Cyclic voltammetry (CV) experiments were conducted using a Princeton PAR273A potentiostat at scan rates of  $0.1 \text{ mV s}^{-1}$ . Electrochemical impedance measurements were carried out using a Zahner IM6 electrochemical workstation with an applied perturbation signal of 5 mV over the frequency range of 100 kHz to 10 mHz.

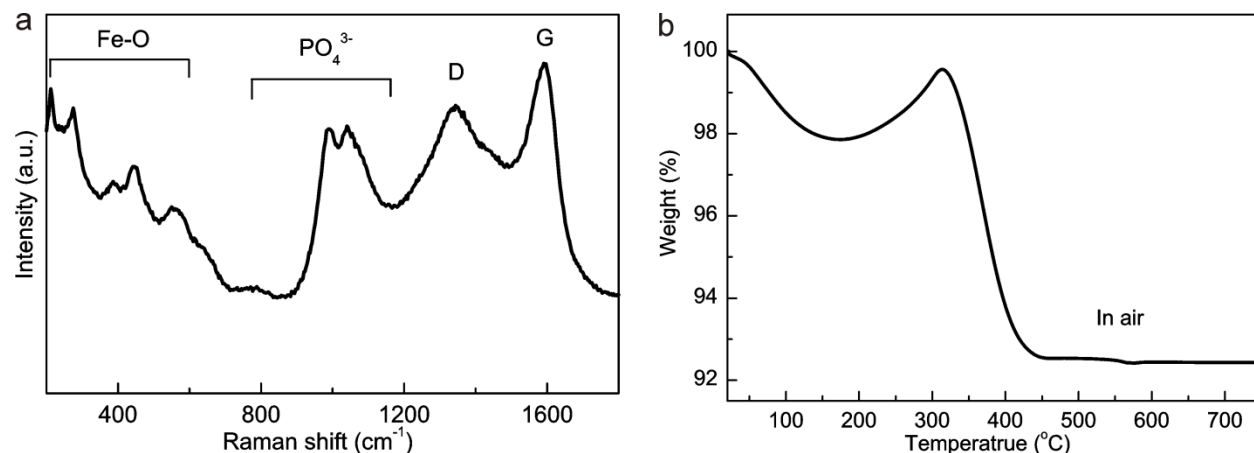

Figure S1. (a) Raman spectrum of the nano-LiFePO<sub>4</sub>@C nanocomposite. The fundamental D and G bands of carbon occur at 1345 cm<sup>-1</sup> and 1594 cm<sup>-1</sup>. (b) Thermogravimetric analysis (TGA) curve of nano LiFePO<sub>4</sub>@C.

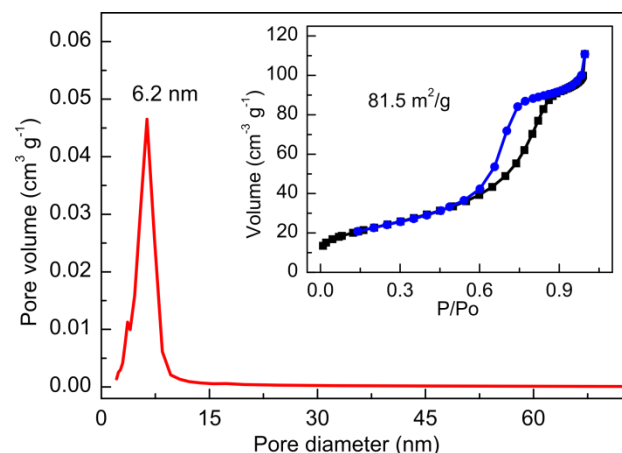

Figure S2. A desorption isotherm was used to determine the pore size distribution by the Barret–Joyner–Halender (BJH) method, the inset shows the corresponding nitrogen adsorption-desorption isotherms at 77 K.

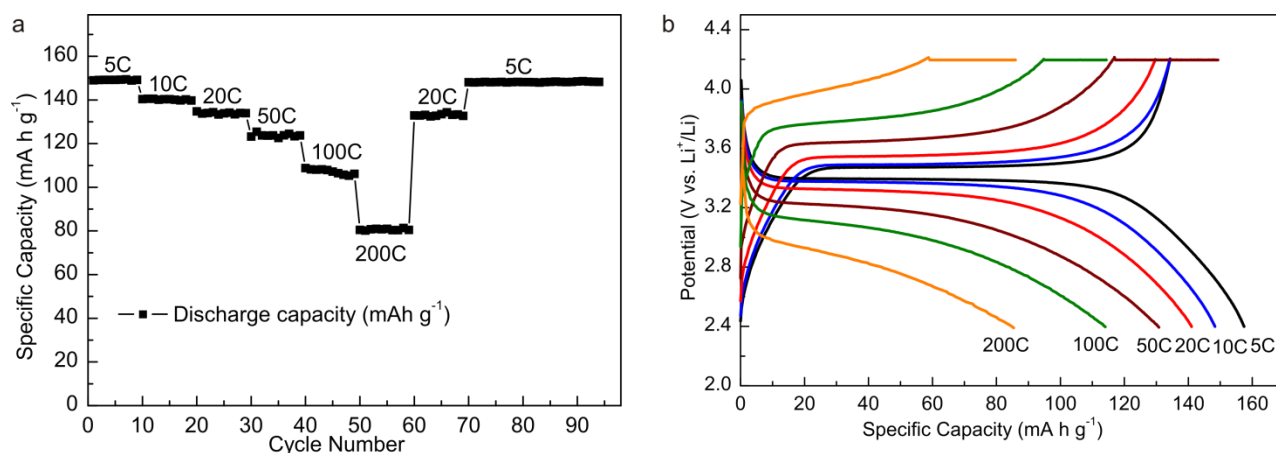

Figure S3. (a) Discharge capacity versus cycle number plots of LiFePO<sub>4</sub>@C from 5C to 200C at room temperature. (b) corresponding charge/discharge curve of nano-LiFePO<sub>4</sub>@C.

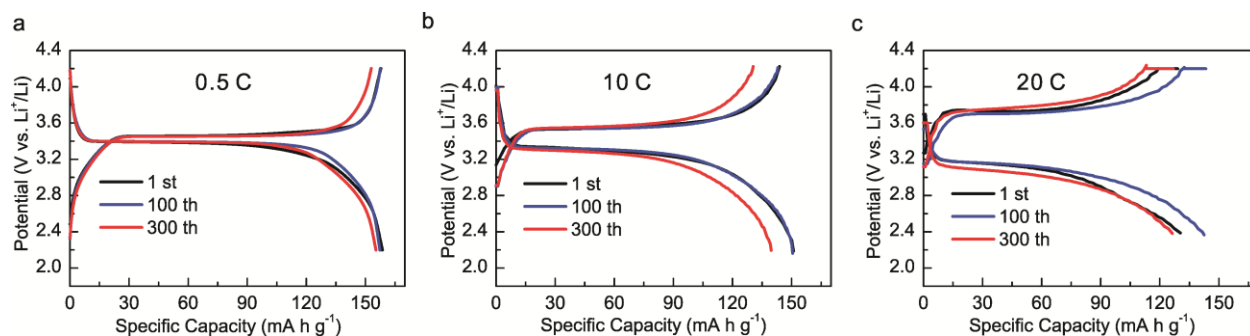

Figure S4. Charge/discharge curve at (a) 0.5C, (b) 10C, (c) 20C, respectively. 1C=170 mA g<sup>-1</sup>.

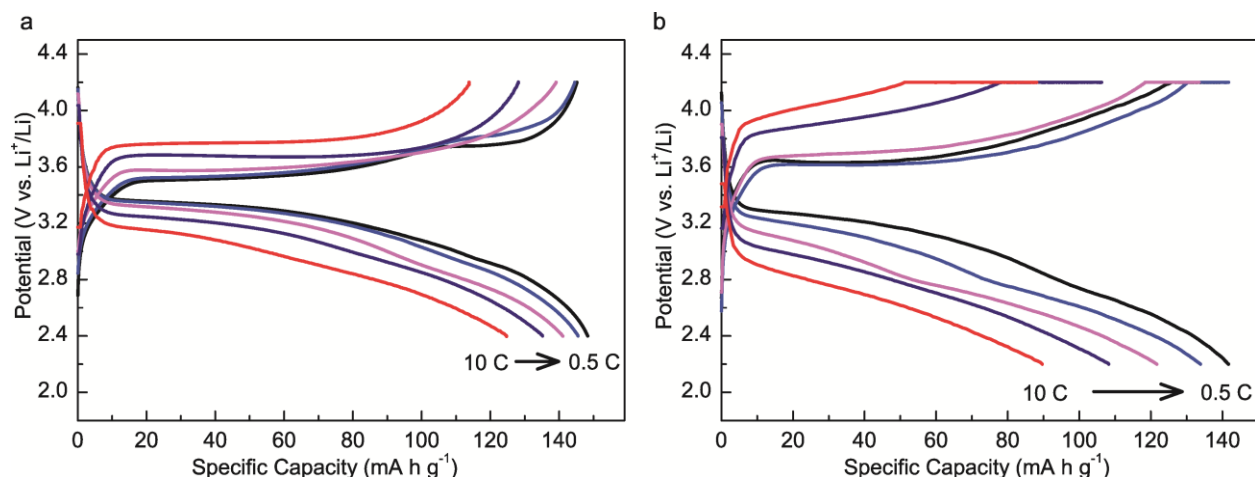

Figure S5. Charge/discharge curve of nano-LiFePO<sub>4</sub>@C at (a) 0°C and (b) -20°C, respectively. 1C=140 mA g<sup>-1</sup>.

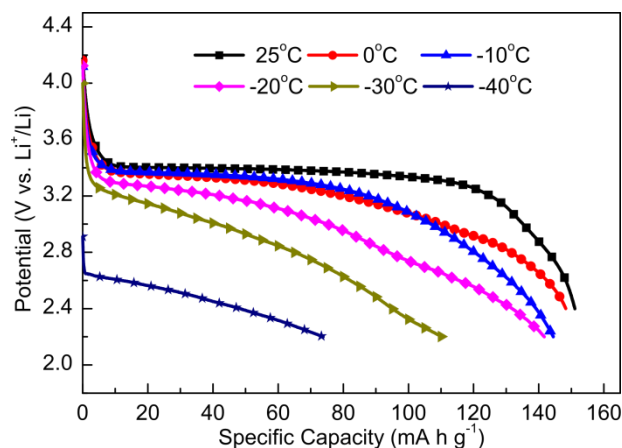

Figure S6. Discharge curve of nano-LiFePO<sub>4</sub>@C in the temperature range of -40°C~25°C at discharge rate of 0.5C. Due to the nanosize effect and the electrical polarization at low temperature,<sup>3, 4</sup> the discharge curve of nano-LiFePO<sub>4</sub>@C at 0.5C do not exhibit a well flat plateau especially below -20°C.

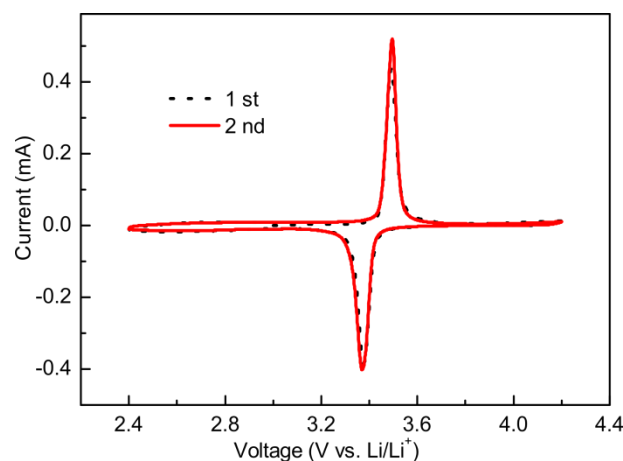

Figure S7. Cyclic voltammograms at a sweep rate of  $0.1 \text{ mV s}^{-1}$ .

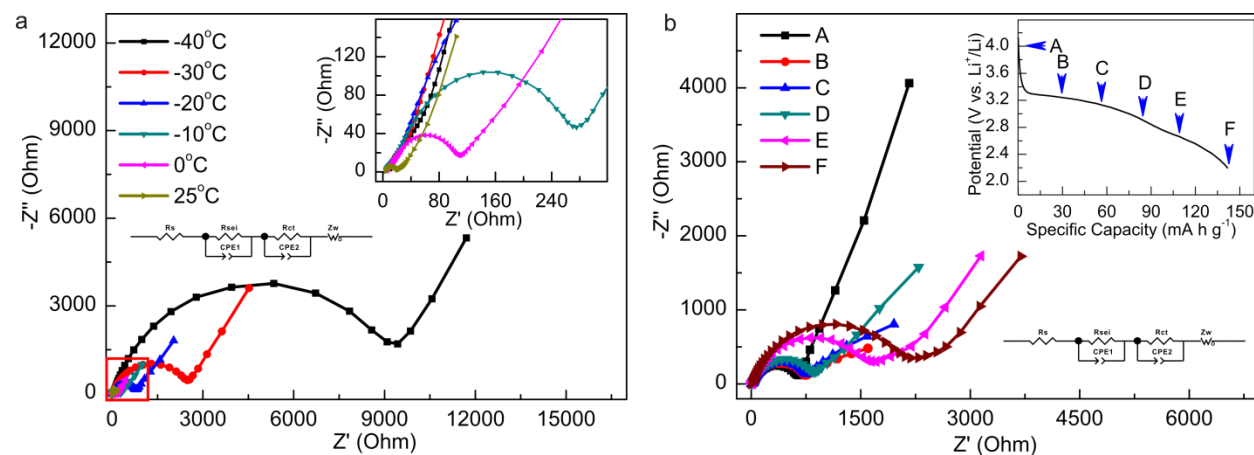

Figure S8. The typical Nyquist plots: (a) nano- $\text{LiFePO}_4@\text{C}$  from  $25^\circ\text{C}$  to  $-40^\circ\text{C}$  at full charge state. Inset of (a): enlarged profiles. (b) nano- $\text{LiFePO}_4@\text{C}$  at different discharge state at  $-20^\circ\text{C}$ . Inset of (b): showing the discharge curve for impedance measurements at  $0.5\text{C}$ .

**Table S1.** Comparison of LiFePO<sub>4</sub>/C reported in literatures

| Materials                                                 | Morphology                     | size                              | Room temperature<br>/mAh g <sup>-1</sup> |              |              | Low temperature<br>/mAh g <sup>-1</sup> |              | Electrode<br>formulation | Carbon<br>content    |
|-----------------------------------------------------------|--------------------------------|-----------------------------------|------------------------------------------|--------------|--------------|-----------------------------------------|--------------|--------------------------|----------------------|
|                                                           |                                |                                   | 5 C                                      | 10C          | 100 C        | -15 °C                                  | -20 °C       |                          |                      |
| LiFePO <sub>4</sub> /C <sup>5</sup>                       | micro hollow<br>spheres        | ~1 um                             | 125                                      | 117          | —            | —                                       | —            | 70:20:10                 | 7.7 wt%              |
| LiFePO <sub>4</sub> @C/CNT <sup>6</sup>                   | Nearly sphere                  | 90 nm                             | —                                        | 128<br>(15C) | 100          | 128<br>(0.2C)                           | —            | 85:10:5                  | 5.7 wt%              |
| LiFePO <sub>4</sub> /C <sup>7</sup>                       | Nanosheets                     | Thickness:<br>4.3 nm              | —                                        | 139          | 70<br>(80 C) | —                                       | —            | 80:10:10                 | 2 wt%                |
| LiFePO <sub>4</sub> /C <sup>8</sup>                       | Nanowire                       | Diameter:<br>100 nm               | 114                                      | 93           | —            | —                                       | —            | 70:20:10                 | 1 wt%                |
| LiFePO <sub>4</sub> /C <sup>9</sup>                       | nanoplate<br>microspheres      | Diameter: 1-2<br>um               | 85                                       |              | —            | —                                       | —            | 78:12:10                 | 3.01 wt%             |
| LiFePO <sub>4</sub> /C/ppy <sup>10</sup>                  | Flowerlike<br>microspheres     | 2-5 um                            | 110                                      | 86           | —            | —                                       | —            | 75:20:5                  | 5 wt%<br>ppy: 12 wt% |
| PEDOT-LiFePO <sub>4</sub> <sup>11</sup>                   | Particles                      | 200 nm                            | —                                        | 123          | —            | —                                       | —            | 84.5:8:7.5               | 0                    |
| LiFePO <sub>4</sub> /C <sup>12</sup>                      | Mesoporous<br>nanocomposite    | —                                 | 130                                      | 118          | —            | —                                       | —            | 80:10:10                 | 13 wt%               |
| Double-coated carbon<br>LiFePO <sub>4</sub> <sup>13</sup> | Microspheres<br>nanoporous     | Primary<br>particle<br>200-300 nm | —                                        | 115.6        | —            | —                                       | 75<br>(1C)   | 85:7.5:7.5               | 3.1 wt%              |
| LiFePO <sub>4</sub> /C <sup>14</sup>                      | —                              | —                                 | 95                                       | —            | —            | —                                       | 90<br>(1C)   | 75:15:10                 | 2.7 wt%              |
| LiFePO <sub>4</sub> /C <sup>15</sup>                      | —                              | —                                 | 110                                      | —            | —            | —                                       | 78<br>(1C)   | 80:15:5                  | 5 wt%                |
| <b>This work</b>                                          | Hierarchical<br>microparticles | Primary<br>particle 30<br>nm      | 149                                      | 140          | 107          | —                                       | 133<br>(1 C) | 80:10:10                 | 6.7 wt%              |

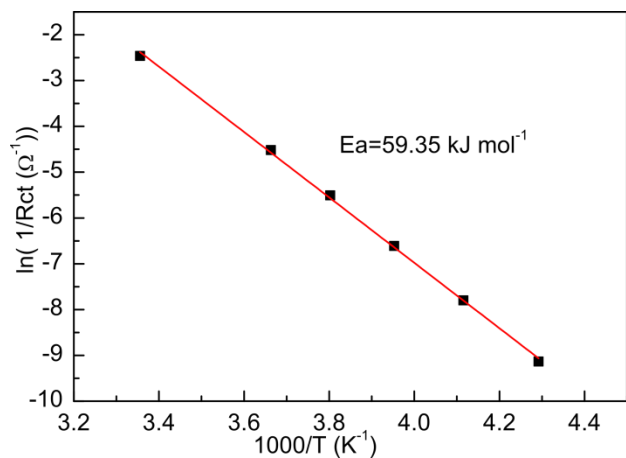

**Figure S9.** The linear relationship between 1000/T and ln(1/Rct).

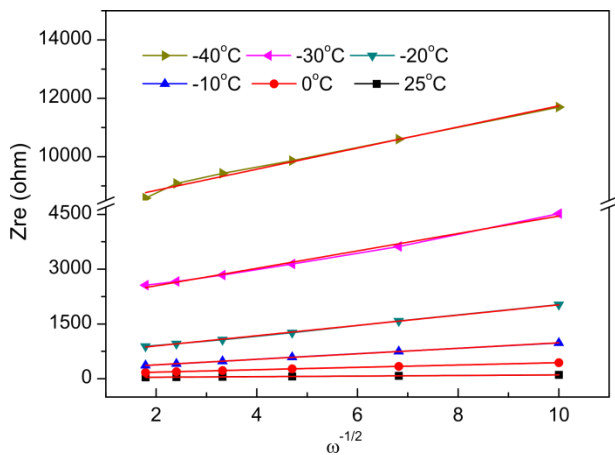

**Figure S10.** variations and fi ttings between Z re and the reciprocal square root of the angular frequency in the lowfrequency region of nano-LiFePO<sub>4</sub>@C.

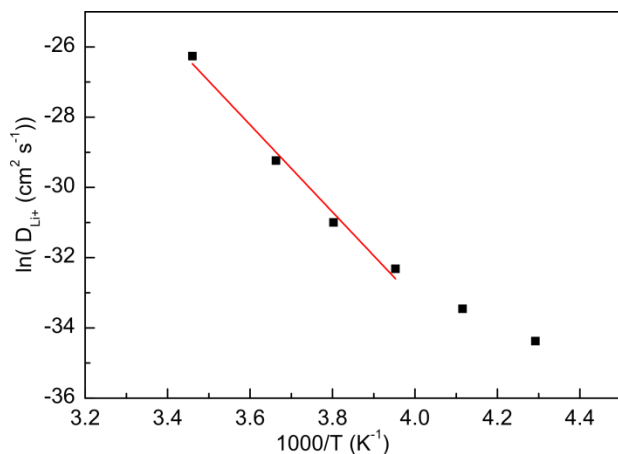

**Figure S11.** Arrhenius plots of the apparent chemical diffusion coefficient of lithium ions.

**Table S2.** Impedance parameters derived using equivalent circuit model and lithium diffusion coefficient  $D_{Li+}$  for nano-LiFePO<sub>4</sub>@C.

| Temperature | Rs (ohm) | Rsei (ohm) | Rct (ohm) | $D_{Li+}$ (cm <sup>2</sup> s <sup>-1</sup> ) |
|-------------|----------|------------|-----------|----------------------------------------------|
| 25°C        | 3.782    | 2.392      | 11.73     | $3.93 \times 10^{-12}$                       |
| 0°C         | 5.399    | 6.825      | 91.46     | $2.01 \times 10^{-13}$                       |
| -10°C       | 4.057    | 13.21      | 245.9     | $3.45 \times 10^{-14}$                       |
| -20°C       | 4.562    | 19.58      | 742.9     | $9.23 \times 10^{-15}$                       |
| -30°C       | 5.815    | 30.12      | 2438      | $2.96 \times 10^{-15}$                       |
| -40°C       | 8.829    | 50.89      | 9258      | $1.18 \times 10^{-15}$                       |

The diffusion coefficients  $D_{Li+}$  at various temperature are calculated based the Warburg region by using the following equation<sup>16</sup>:

$$D = (R^2T^2)/(2A^2n^4F^4C^2\sigma^2) \tag{1}$$

Where R is the gas constant, T is the absolute temperature, A is the surface area of the cathode, n the number of electrons per molecule during oxidization, F the Faraday constant, C the concentration of lithium-ion ( $7.69 \times 10^{-3}$  mol cm<sup>-3</sup>), and  $\sigma$  is the Warburg factor associated with Zre ( $Zre \propto \sigma \omega^{-1/2}$ , as shown in Figure S10).

## References

1. V. Mazumder and S. Sun, *J. Am. Chem. Soc.*, 2009, **131**, 4588-4589.
2. C. Wang, J. J. Chen, Y. N. Shi, M. S. Zheng and Q. F. Dong, *Electrochimica Acta*, 2010, **55**, 7010-7015.
3. G. Kobayashi, S. I. Nishimura, M. S. Park, R. Kanno, M. Yashima, T. Ida and A. Yamada, *Adv Funct Mater*, 2009, **19**, 395-403.
4. X. H. Rui, Y. Jin, X. Y. Feng, L. C. Zhang and C. H. Chen, *J. Power Sources*, 2011, **196**, 2109-2114.
5. S. Yang, M. Hu, L. Xi, R. Ma, Y. Dong and C. Y. Chung, *ACS Applied Materials & Interfaces*, 2013, **5**, 8961-8967.
6. X.-L. Wu, Y.-G. Guo, J. Su, J.-W. Xiong, Y.-L. Zhang and L.-J. Wan, *Adv. Energy Mater.*, 2013, **3**, 1155-1160.
7. X. Rui, X. Zhao, Z. Lu, H. Tan, D. Sim, H. H. Hng, R. Yazami, T. M. Lim and Q. Yan, *ACS Nano*, 2013, **7**, 5637-5646.
8. C. B. Zhu, Y. Yu, L. Gu, K. Weichert and J. Maier, *Angewandte Chemie-International Edition*, 2011, **50**, 6278-6282.
9. Y. M. Wu, Z. H. Wen and J. H. Li, *Advanced Materials*, 2011, **23**, 1126-1129.
10. C. W. Sun, S. Rajasekhara, J. B. Goodenough and F. Zhou, *Journal of the American Chemical Society*, 2011, **133**, 2132-2135.
11. D. Lepage, C. Michot, G. X. Liang, M. Gauthier and S. B. Schougaard, *Angewandte Chemie-International Edition*, 2011, **50**, 6884-6887.
12. G. Wang, H. Liu, J. Liu, S. Qiao, G. M. Lu, P. Munroe and H. Ahn, *Advanced Materials*, 2010, **22**, 4944-4948.
13. S. W. Oh, S. T. Myung, S. M. Oh, K. H. Oh, K. Amine, B. Scrosati and Y. K. Sun, *Advanced Materials*, 2010, **22**, 4842-+.
14. X.-Z. Liao, Z.-F. Ma, Q. Gong, Y.-S. He, L. Pei and L.-J. Zeng, *Electrochem. Commun.*, 2008, **10**, 691-694.
15. S. S. Zhang, K. Xu and T. R. Jow, *J. Power Sources*, 2006, **159**, 702-707.
16. A. L. Bard, L. R. Faulkner, *Electrochemical Methods*, 2nd ed., Wiley, **2001**.
